# Supplementary material
Source: PubMed Central journal article supplement (PMC10995942)
Supplement: cs3c04010_si_001.pdf [file cs3c04010_si_001.pdf]

## Supporting Information

### Retracing the Rapid Evolution of an Herbicide-Degrading Enzyme by Protein Engineering

*Markus R. Busch<sup>1</sup>, Lukas Drexler<sup>1</sup>, Dhani Ram Mahato<sup>2</sup>, Caroline Hiefinger<sup>1</sup>, Sílvia Osuna<sup>2,3\*</sup>, Reinhard Sterner<sup>1\*</sup>*

<sup>1</sup>Institute of Biophysics and Physical Biochemistry, Regensburg Center for Biochemistry, University of Regensburg, D-93040 Regensburg, Germany.

<sup>2</sup>CompBioLab Group, Institut de Química Computacional i Catàlisi (IQCC) and Departament de Química, Universitat de Girona, Girona 17003, Spain.

<sup>3</sup>ICREA, Barcelona 08010, Spain.

#### **\*Corresponding Authors:**

Sílvia Osuna: Email: [silvia.osuna@udg.edu](mailto:silvia.osuna@udg.edu)

Reinhard Sterner: Email: [reinhard.sterner@ur.de](mailto:reinhard.sterner@ur.de)

SUPPLEMENTAL FIGURES

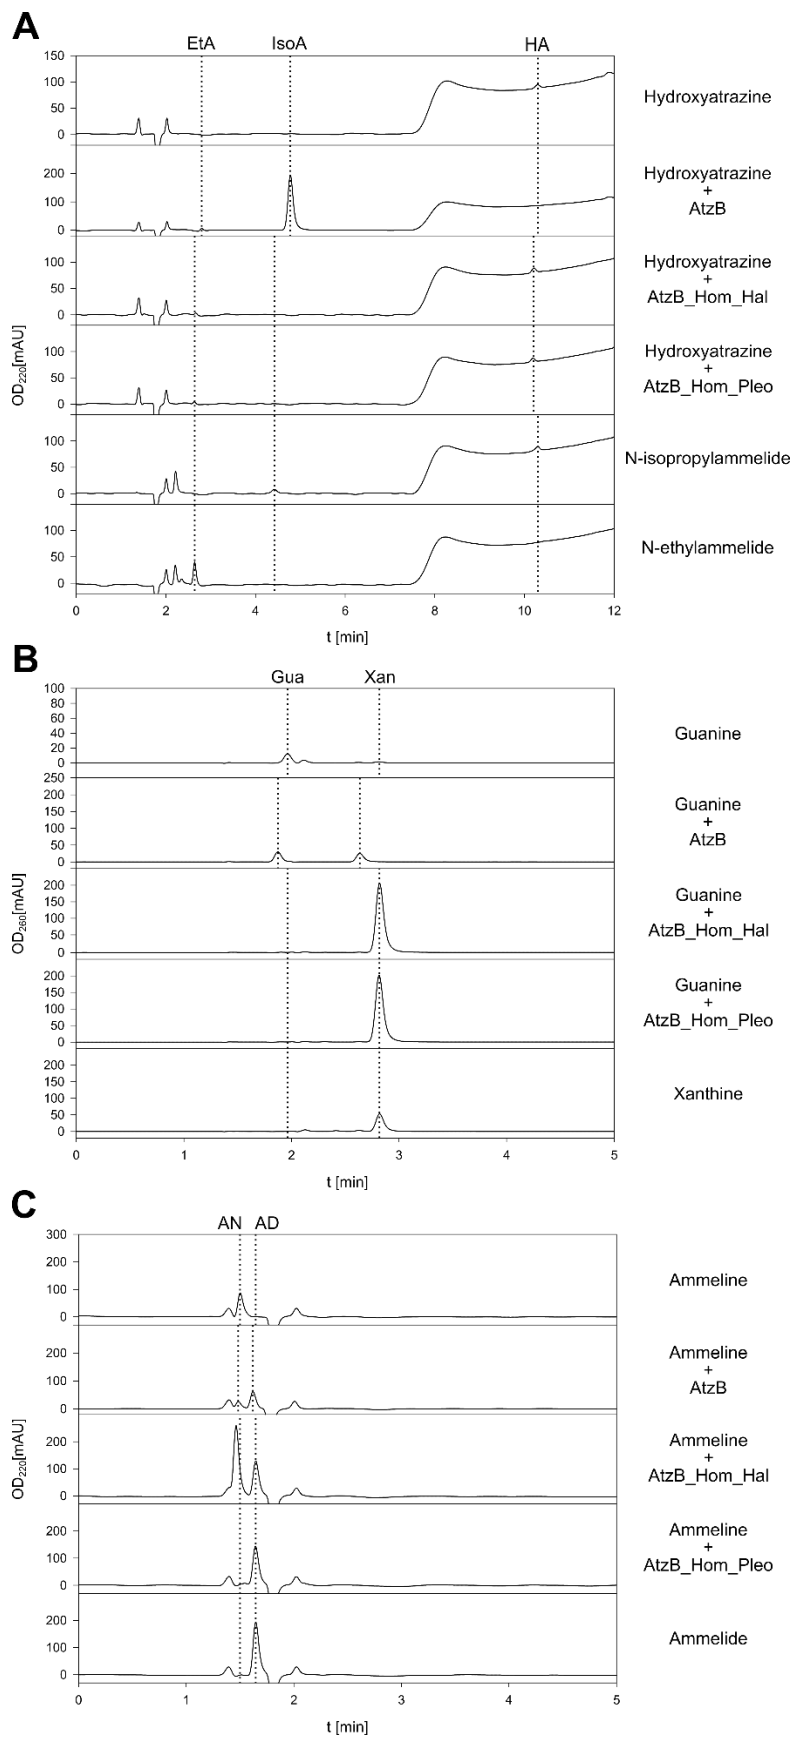

**Figure S1: Substrate screening of AtzB, AtzB\_Hom\_Hal, and AtzB\_Hom\_Pleo.** (A) AtzB specifically turns over hydroxyatrazine (HA) into N-isopropylammelide (IsoA) with only a minor peak of N-ethylammelide (EtA). AtzB\_Hom\_Hal and AtzB\_Hom\_Pleo exhibit a weak hydroxyatrazine hydrolase activity, producing mainly EtA. (B) Guanine (Gua) is hydrolyzed into xanthine (Xan) by AtzB, AtzB\_Hom\_Hal, and AtzB\_Hom\_Pleo. (C) All three enzymes exhibit a hydrolytic activity on the anthropogenic substance ammeline (AN), deaminating it to ammelide (AD). Due to column aging, peaks are off-set in some experiments. All enzymatic assays contained 500  $\mu\text{M}$  of the respective substrate and 10  $\mu\text{M}$  of the enzyme variant, which were incubated for 20 h at RT.

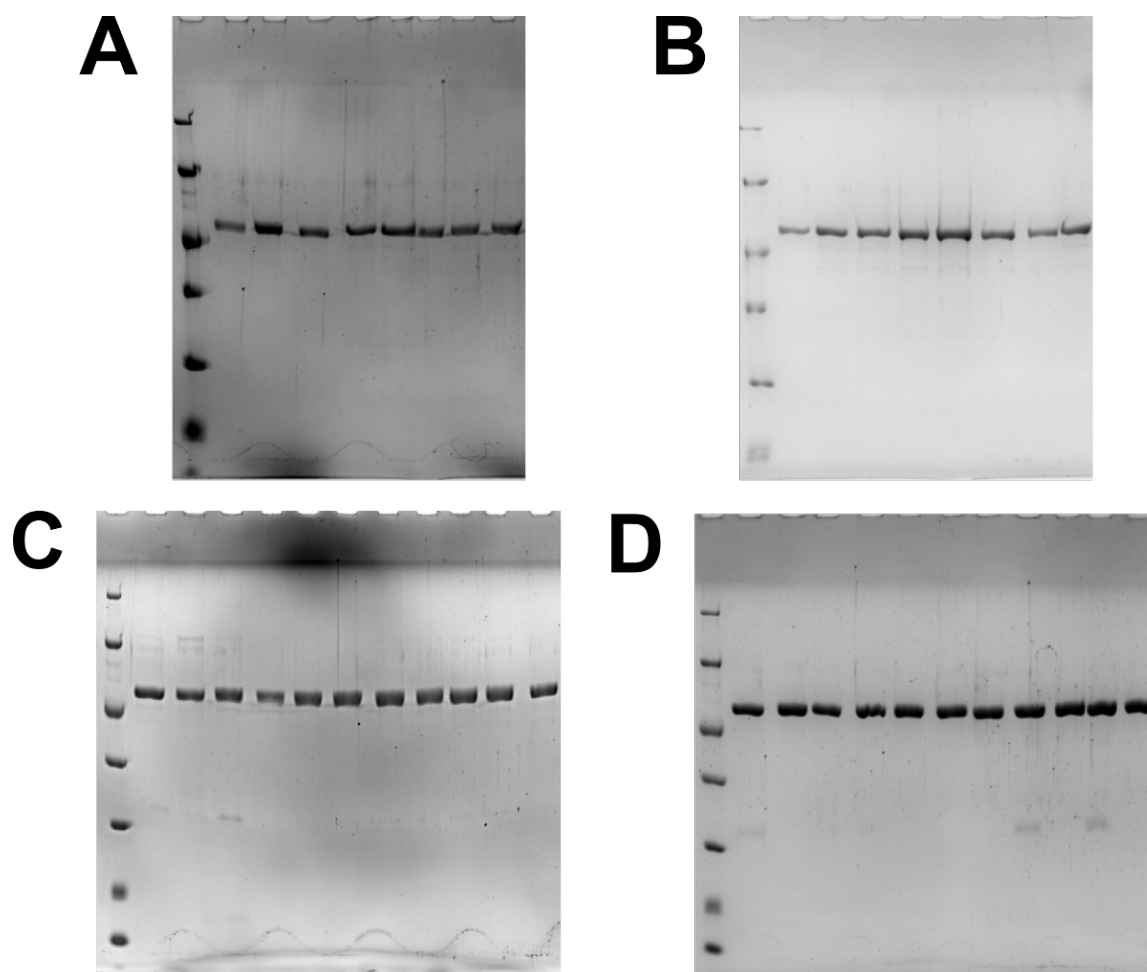

**Figure S2: Assessment of protein purity by SDS-PAGE.** (A) Bands correspond to protein standard (LMW, Thermo Fisher Scientific), wild-type AtzB, and AtzB variants I170N, S218C, S219Q, I222N, S218C I170N, S218C S219Q, and S218C I222N. (B) Bands correspond to protein standard and AtzB variants S219Q I170N, I170N I222N, S219Q I222N, S218C S219Q I170N, S218C S219Q I222N, S218C I170N I222N, S219Q I170N I222N, and S218C S219Q I222N I170N. (C) Bands correspond to protein standard, wild-type AtzB\_Hom\_Hal, and AtzB\_Hom\_Hal variants N161I, C209S, Q210S, N213I, Q210S N161I, Q210S C209S, Q210S N213I, Q210S N213I C209S, Q210S N213I N161I, and Q210S N213I N161I C209S. (D) Bands correspond to protein standard, wild-type AtzB\_Hom\_Pleo, and AtzB\_Hom\_Pleo variants N165I, C213S, Q214S, N217I, N217I N165I, N217I C213S, N217I Q214S, N217I N165I C213S, N217I N165I Q214S, and N217I N165I Q214S C213S. Each protein band contains 3  $\mu$ g of the respective protein variant.

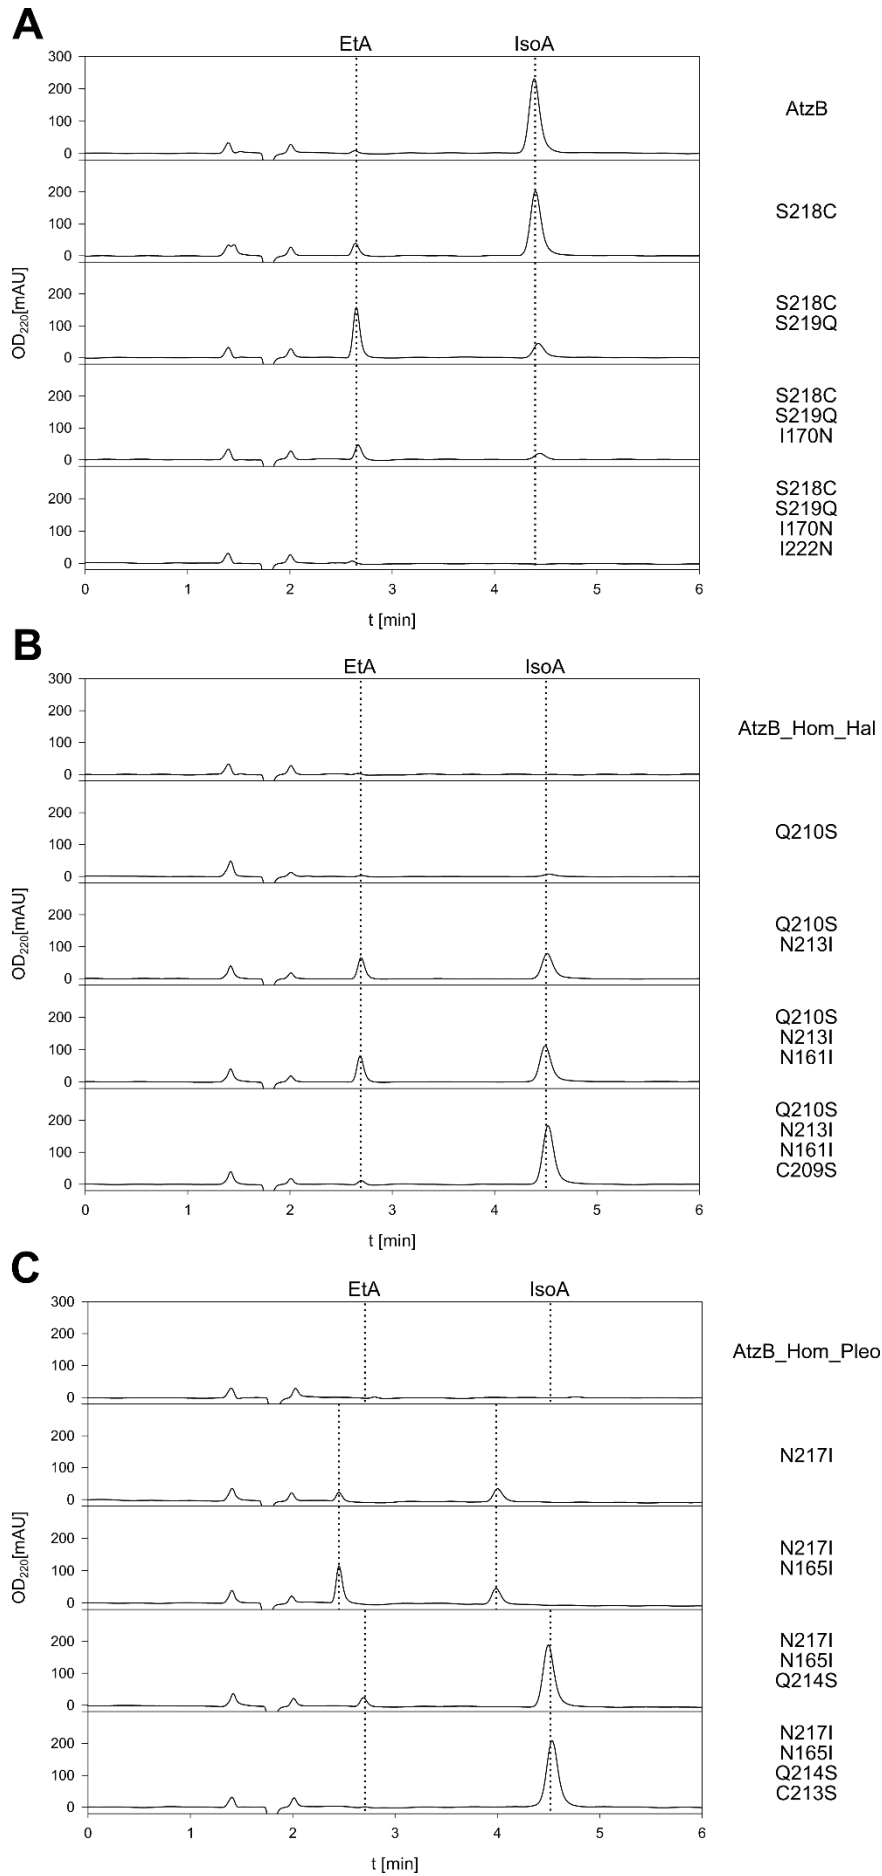

**Figure S3: Analysis of product mixtures of hydroxyatrazine hydrolysis.** Hydroxyatrazine hydrolysis can result in either N-isopropylammelide (IsoA) or N-ethylammelide (EtA). Variants of AtzB (**A**) along the main evolutionary trajectory progressively lose the specificity for hydroxyatrazine ethylaminohydrolysis found in the wild type. Variants of AtzB\_Hom\_Hal (**B**) and AtzB\_Hom\_Pleo (**C**) gain selectivity for ethylaminohydrolysis along their respective evolutionary trajectories with the selectivity of the resulting quadruple variants being comparable to that of wild-type AtzB. All reaction mixtures result from the conversion of 500  $\mu\text{M}$  hydroxyatrazine by 2  $\mu\text{M}$  of the respective enzyme over 20 h at 25°C. The results shown here correspond to the ones visualized in Figure 5 in the main text.

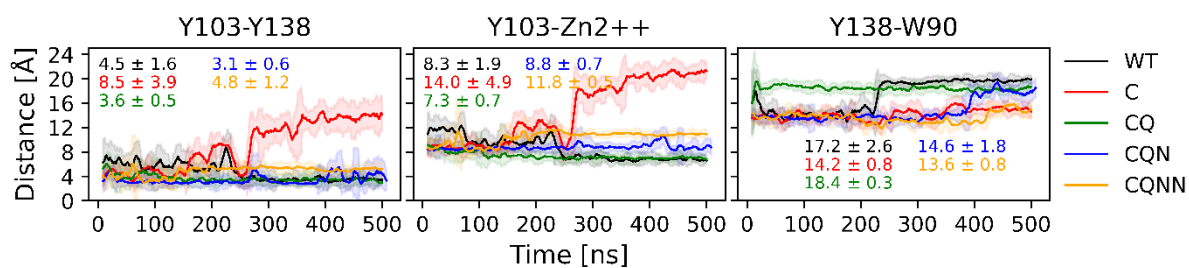

**Figure S4. Plot of key active site distances for AtzB, AtzB-C, AtzB-CQ, AtzB-CQN, AtzB-CQNN.** Distances (in Angstrom) for the AtzB apo structures: AtzB (black line), AtzB-C (red), AtzB-CQ (green), AtzB-CQN (blue), AtzB-CQNN (yellow). The left plot monitors the distance between the hydroxyl oxygens of Y103(OH) and Y138(OH), the middle plot the distance between the hydroxyl oxygen of Y103(OH) and the Zn(II) atom, and the right plot the distance for the Y138(OH) and the NH of the indole ring of W90.

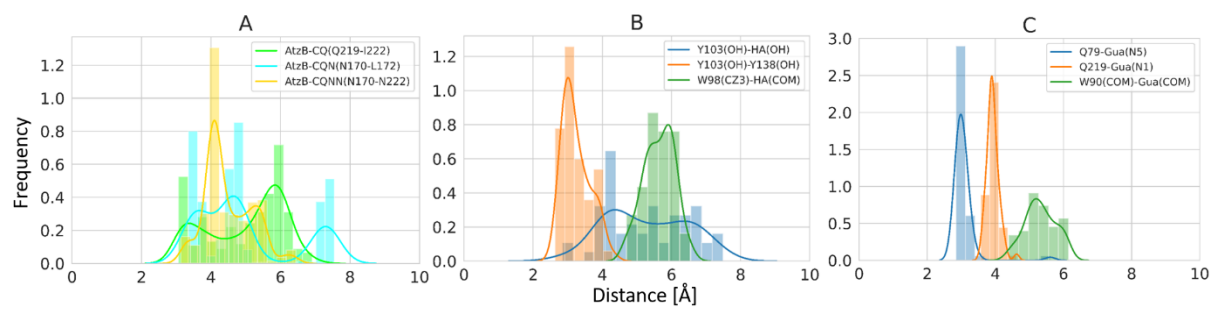

**Figure S5. Histogram and distribution plot of key active site distances in (A) apo structures, and AtzB liganded with (B) hydroxyatrazine (HA) and (C) guanine (Gua). All distances are represented in Å.**



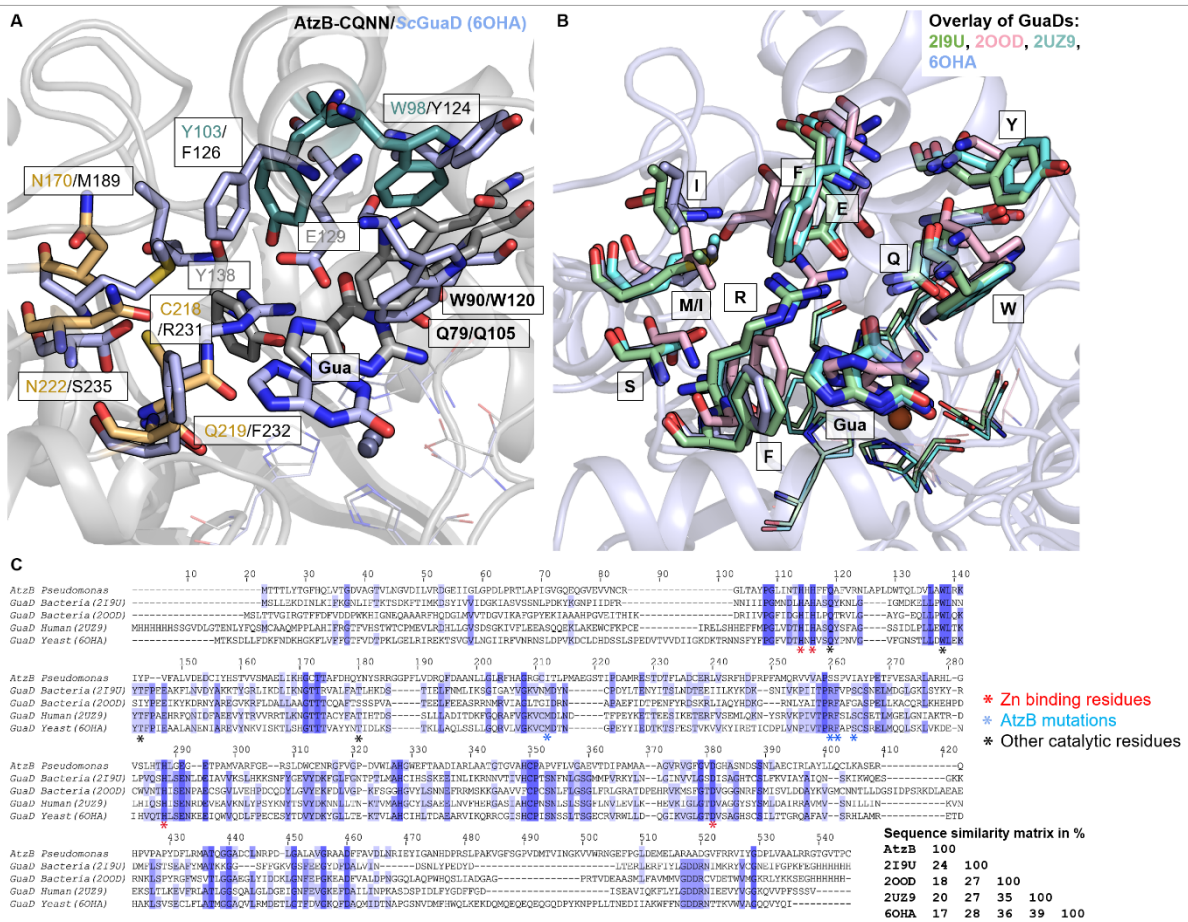

**Figure S6. Structural and sequence comparison of liganded guanine deaminases (GuaD) and a representative conformation of AtzB-CQNN with guanine bound from 100 ns MD simulation. (A)** Overlay of AtzB-CQNN (residues shown in gray, yellow and teal, guanine in gray) with *Saccharomyces cerevisiae* GuaD (PDB code: 6OHA, shown in light blue). **(B)** Overlay of available guanine/xanthine-bound crystal structures of GuaD: 2I9U (*Clostridium acetobutylicum*, green), 2OOD (*Bradyrhizobium diazoefficiens*, pink), 2UZ9 (*Homo sapiens*, cyan) and 6OHA (*Saccharomyces cerevisiae*, light blue). **(C)** Sequence alignment showing the metal binding residues and active site residues. The sequence identity of the GuaD enzymes with respect to AtzB is: 2I9U (24%), 2OOD (18%), 2UZ9 (20%), and 6OHA (17%). Despite having low sequence similarities, GuaDs and AtzB share many of the key active residues for catalysis.

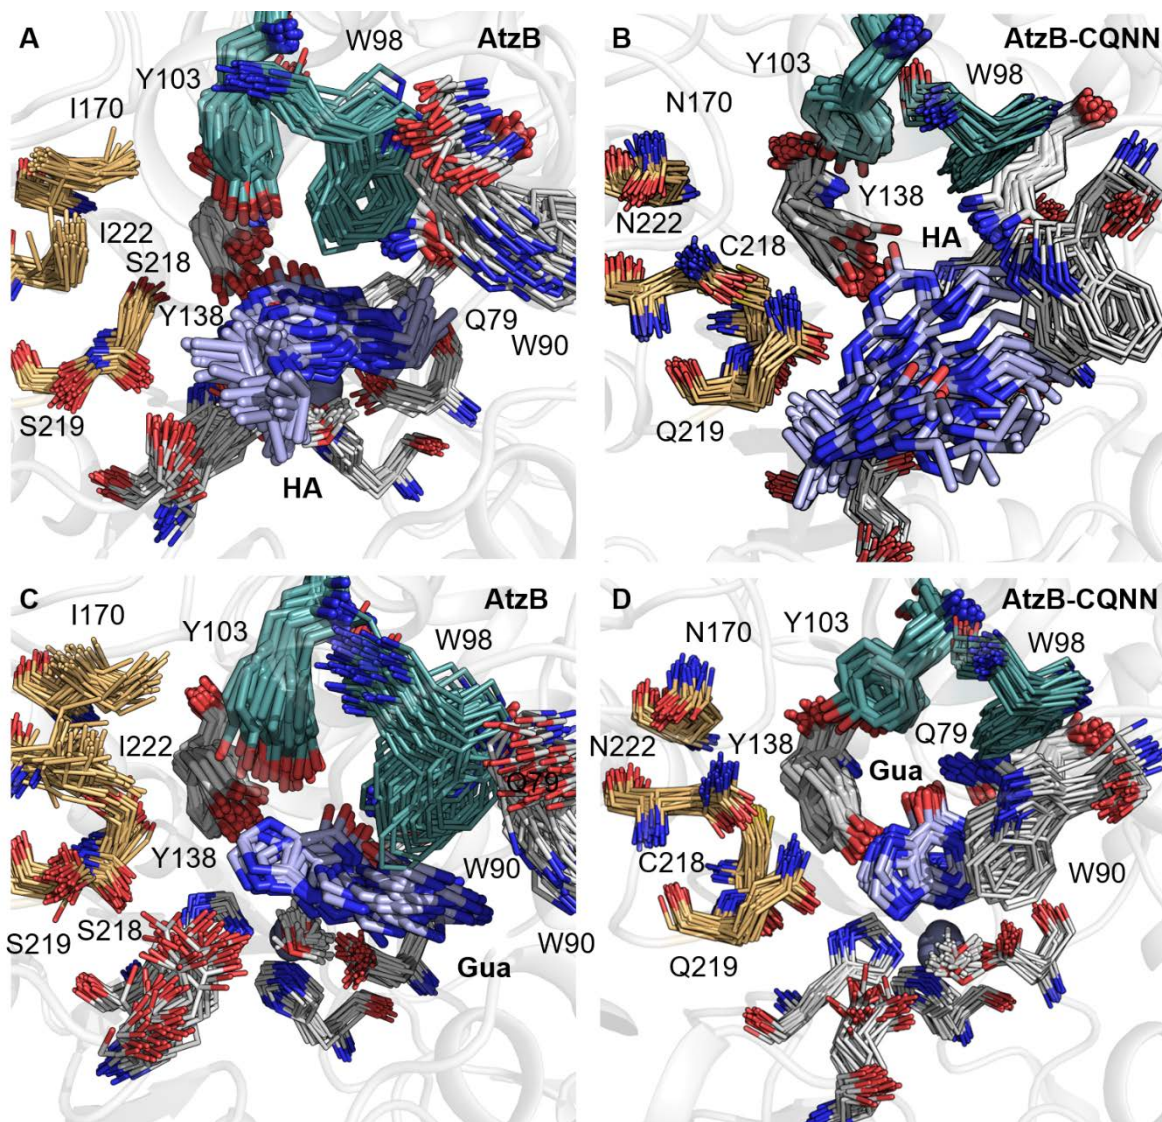

**Figure S7. Overlay of conformations explored in the 100 ns MD simulations with either hydroxyatrazine (HA) or guanine (Gua) bound in the AtzB and AtzB-CQNN active sites. The active site of wild-type AtzB bound with different conformations of HA in a productive conformation (A), while in AtzB-CQNN structure HA can no longer orient this substrate correctly for catalysis (B). Inversely, AtzB cannot productively bind Gua with proper confirmation (C), while in AtzB-CQNN (D) Gua is correctly positioned.**

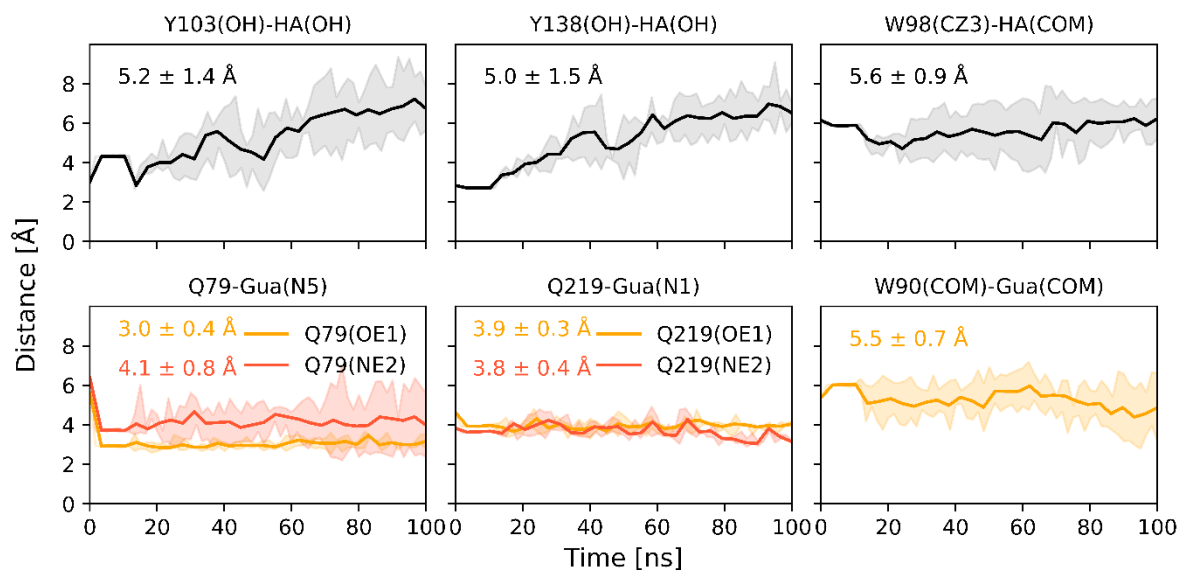

**Figure S8. Plot of key active site distances for AtzB, and AtzB-CQNN in the presence of either hydroxyatrazine (HA) or guanine (Gua).** Distances (in Angstrom) for AtzB (black line), and AtzB-CQNN (yellow/red).

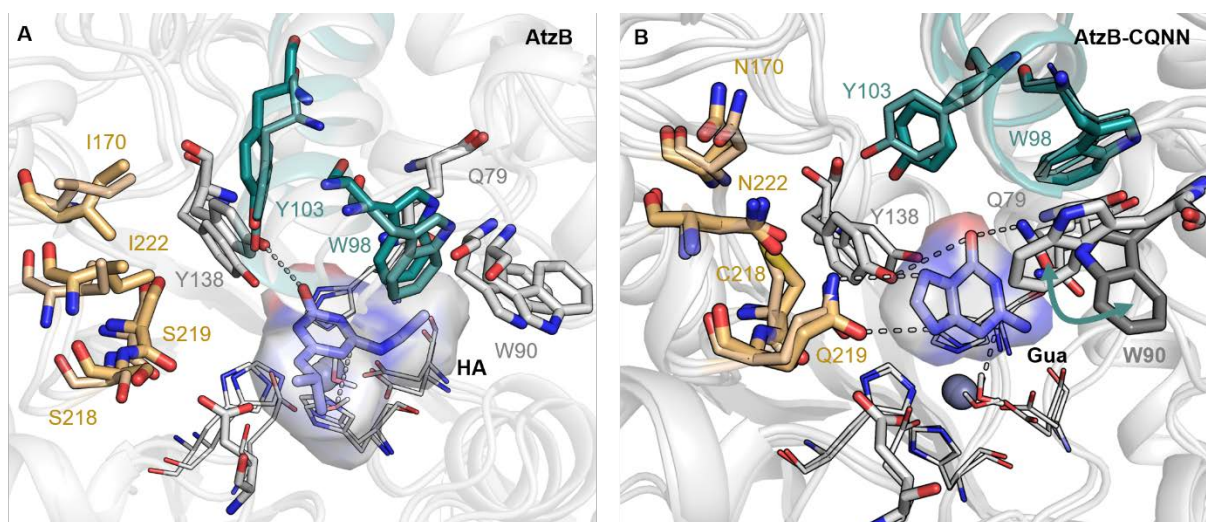

**Figure S9. Overlay of the most populated representative conformation of (A) AtzB and (B) AtzB-CQNN in the unliganded and liganded states.** The conformation of the active site residues is very similar in both cases, the only exception being W90 in AtzB-CQNN. In that case, W90 slightly changes the conformation of the indole ring to maximize and establish a CH  $\cdots$   $\pi$  interaction with guanine.

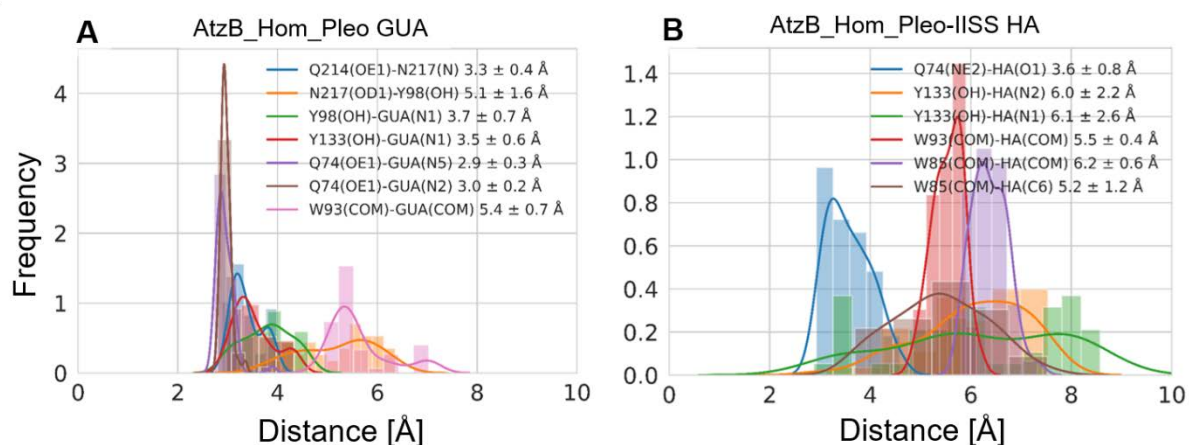

**Figure S10: Distance distribution plots for AtzB\_Hom\_Pleo bound with guanine and hydroxyatrazine substrates. (A)** Distance (in Å) distribution plots for AtzB\_Hom\_Pleo with guanine bound. Guanine is in close contact with Q74, Y98 and Y133. **(B)** Distance (in Å) distribution plots for AtzB\_Hom\_Pleo-IISS with HA bound shows that two residues Q74 and Y133 are in close contact with HA. The distances for W93 and W85 are computed from the center of mass (COM) of the indole and substrate rings.

SUPPLEMENTAL TABLES

**Table S1.** AtzB proteins and AtzB homologues used to construct sequence logos. The local sequence identity results from a BLAST search with *Pseudomonas sp. strain ADP* AtzB as query protein.

| Accession              | NCBI-annotation                                                                             | Organism                             | Sequence identity |
|------------------------|---------------------------------------------------------------------------------------------|--------------------------------------|-------------------|
| <b>AtzB</b>            |                                                                                             |                                      |                   |
| AAC45138.1             | MULTISPECIES:<br>amidohydrolase                                                             | <i>Proteobacteria</i>                | 100 %             |
| WP_130110726.1         | amidohydrolase                                                                              | <i>Leucobacter triazinivorans</i>    | 98.74 %           |
| ACI14308.1             | hydroxyatrazine hydrolase,<br>partial                                                       | <i>Pseudomonas sp.</i><br>AD39       | 99.22 %           |
| WP_192321895.1         | amidohydrolase family protein                                                               | <i>Aminobacter sp.</i><br>SR38       | 99.38 %           |
| BAD69556.1             | hydroxyatrazine hydrolase                                                                   | <i>beta proteobacterium</i><br>CDB21 | 99.37 %           |
| AAAY40323.2            | hydroxysimazine hydrolase <sup>+</sup>                                                      | <i>Herbaspirillum sp.</i><br>B601    | 99.58 %           |
| WP_011777000.1         | MULTISPECIES:<br>amidohydrolase                                                             | <i>Micrococcaceae</i>                | 100 %             |
| ERI35184.1             | amidohydrolase                                                                              | <i>Arthrobacter sp.</i> AK-<br>YN10  | 99.79 %           |
| AGU71906.1             | hydroxyatrazine hydrolase                                                                   | <i>Arthrobacter sp.</i><br>DNS10     | 99.79 %           |
| ACC78169.1             | hydroxyatrazine hydrolase,<br>partial                                                       | <i>Arthrobacter sp.</i><br>AD26      | 100 %             |
| <b>AtzB Homologues</b> |                                                                                             |                                      |                   |
| WP_135441588.1         | amidohydrolase family protein                                                               | <i>Haliaea sp.</i> SAOS-164          | 65.38 %           |
| WP_026793093.1         | amidohydrolase                                                                              | <i>Pleomorphomonas oryzae</i>        | 61.47 %           |
| WP_101287147.1         | amidohydrolase                                                                              | <i>Pleomorphomonas diazotrophica</i> | 60.56 %           |
| NTJ65121.1             | amidohydrolase                                                                              | <i>Agrobacterium rhizogenes</i>      | 59.58 %           |
| OHC53060.1             | amidohydrolase                                                                              | <i>Rhodobacterales bacterium</i>     | 59.54 %           |
| WP_132536943.1         | amidohydrolase                                                                              | <i>Rhizobium sp.</i> PP-<br>F2F-G48  | 59.48 %           |
| WP_062694026.1         | amidohydrolase                                                                              | <i>Rhizobium sp.</i><br>Leaf341      | 59.35 %           |
| WP_062472743.1         | MULTISPECIES:<br>amidohydrolase                                                             | unclassified<br><i>Rhizobium</i>     | 59.35 %           |
| WP_183711985.1         | MULTISPECIES:<br>amidohydrolase                                                             | unclassified<br><i>Rhizobium</i>     | 59.35 %           |
| MBO9628520.1           | amidohydrolase                                                                              | <i>Shinella sp.</i>                  | 59.35 %           |
| WP_251730559.1         | amidohydrolase family protein                                                               | <i>Pleomorphomonas sp.</i> NRK KF1   | 59.28 %           |
| WP_095436959.1         | amidohydrolase                                                                              | <i>Rhizobium sp.</i><br>11515TR      | 59.11 %           |
| MBS1168142.1           | hydroxydechloroatrazine<br>ethylaminohydrolase<br>(hydroxyatrazine hydrolase) <sup>++</sup> | <i>Proteobacteria bacterium</i>      | 58.93 %           |

|                |                                        |                                         |         |
|----------------|----------------------------------------|-----------------------------------------|---------|
| WP_054007318.1 | amidohydrolase                         | <i>Cypionkella psychrotolerans</i>      | 58.92 % |
| WP_183872653.1 | amidohydrolase                         | <i>Rhizobium</i> sp. BK491              | 58.88 % |
| WP_092852053.1 | amidohydrolase                         | <i>Rhizobium miluonense</i>             | 58.88 % |
| WP_069614677.1 | MULTISPECIES:<br>amidohydrolase        | unclassified<br><i>Rhizobium</i>        | 58.88 % |
| WP_015342298.1 | MULTISPECIES:<br>amidohydrolase        | <i>Rhizobium</i>                        | 58.88 % |
| WP_075632883.1 | amidohydrolase                         | <i>Rhizobium rhizosphaerae</i>          | 58.86 % |
| WP_120669701.1 | MULTISPECIES:<br>amidohydrolase        | unclassified<br><i>Rhizobium</i>        | 58.72 % |
| WP_145646153.1 | MULTISPECIES:<br>amidohydrolase        | unclassified<br><i>Rhizobium</i>        | 58.64 % |
| WP_112343490.1 | amidohydrolase                         | <i>Rhizobium tropici</i>                | 58.64 % |
| WP_149633722.1 | amidohydrolase                         | <i>Rhizobium tropici</i>                | 58.64 % |
| WP_104827655.1 | MULTISPECIES:<br>amidohydrolase        | <i>Rhizobium</i>                        | 58.64 % |
| WP_081177750.1 | amidohydrolase                         | <i>Rhizobium rhizosphaerae</i>          | 58.41 % |
| OYU38210.1     | MAG: amidohydrolase                    | <i>Pseudorhodobacter</i><br>sp. PARRP1  | 58.24 % |
| SIQ86939.1     | hydroxyatrazine<br>ethylaminohydrolase | <i>Rhizobium</i> sp.<br>RU35A           | 58.17 % |
| WP_149747129.1 | amidohydrolase                         | <i>Rhizobium</i> sp.<br>RU35A           | 58.17 % |
| WP_146366487.1 | amidohydrolase                         | <i>Qingshengfaniella alkalisoli</i>     | 58.13 % |
| WP_252733080.1 | amidohydrolase family protein          | <i>Shimia thalassica</i>                | 58.12 % |
| WP_183799496.1 | amidohydrolase                         | <i>Rhizobium</i> sp. BK316              | 58.07 % |
| WP_062368869.1 | amidohydrolase                         | <i>Rhizobium altiplani</i>              | 58.01 % |
| WP_139075739.1 | amidohydrolase                         | <i>Rubellimicrobium rubrum</i>          | 58.00 % |
| WP_092584509.1 | amidohydrolase                         | <i>Rhizobium mongolense</i>             | 58.00 % |
| WP_215570083.1 | amidohydrolase                         | <i>Rhizobium</i> sp. CSW-27             | 57.94 % |
| WP_127906158.1 | amidohydrolase                         | <i>Mesobaculum littorinae</i>           | 57.92 % |
| WP_007825584.1 | amidohydrolase                         | <i>Rhizobium</i> sp. CF142              | 57.88 % |
| WP_074065066.1 | MULTISPECIES:<br>amidohydrolase        | <i>Rhizobium</i>                        | 57.88 % |
| WP_216759008.1 | amidohydrolase                         | <i>Rhizobium</i> sp. WYJ-E13            | 57.88 % |
| WP_210529277.1 | MULTISPECIES:<br>amidohydrolase        | unclassified<br><i>Rubellimicrobium</i> | 57.81 % |

<sup>+</sup> Categorized as AtzB protein due to extremely high sequence identity with the query protein.

<sup>++</sup> Categorized as AtzB homologue due to limited sequence identity with the query protein and lack of experimental characterization.

**Table S2.** Catalytic parameters of mutants of AtzB, AtzB\_Hom\_Hal, and AtzB\_Hom\_Pleo for the deamination of guanine.

| Protein                 | $k_{cat}$ [ $s^{-1}$ ] | $K_M$ [ $\mu M$ ] | $k_{cat}/K_M$ [ $M^{-1}s^{-1}$ ] |
|-------------------------|------------------------|-------------------|----------------------------------|
| AtzB                    | -                      | -                 | n.d. <sup>a</sup>                |
| I170N                   | -                      | -                 | n.d. <sup>a</sup>                |
| S218C                   | -                      | -                 | 9.8±0.23 <sup>b</sup>            |
| S219Q                   | -                      | -                 | n.d. <sup>a</sup>                |
| I222N                   | -                      | -                 | n.d. <sup>a</sup>                |
| S218C I170N             | -                      | -                 | 13±0.66 <sup>b</sup>             |
| S218C S219Q             | -                      | -                 | 43±1.3 <sup>b</sup>              |
| S218C I222N             | -                      | -                 | 2.9±0.10 <sup>b</sup>            |
| S219Q I170N             | -                      | -                 | n.d. <sup>a</sup>                |
| I170N I222N             | -                      | -                 | 7.0±0.34 <sup>b</sup>            |
| S219Q I222N             | 4.4e-3 ± 3.6e-4        | 93±20             | 47±14                            |
| S218C S219Q I170N       | -                      | -                 | 61±2.3 <sup>b</sup>              |
| S218C S219Q I222N       | -                      | -                 | n.d. <sup>a</sup>                |
| S218C I170N I222N       | -                      | -                 | 2.5e2±8.3 <sup>b</sup>           |
| S219Q I170N I222N       | -                      | -                 | 45±1.3 <sup>b</sup>              |
| S218C S219Q I222N I170N | 0.21±8.0e-3            | 53±6.6            | 3.9e3±6.4e2                      |
|                         |                        |                   |                                  |
| AtzB_Hom_Hal            | 0.062±2.1e-3           | 56±6.1            | 1.1e3±1.6e2                      |
| N161I                   | -                      | -                 | n.d. <sup>a</sup>                |
| C209S                   | 0.028±0.010            | 7.4e2±3.5e2       | 38±32                            |
| Q210S                   | 0.095±0.012            | 6.5e2±1.1e2       | 1.4e2±44                         |
| N213I                   | -                      | -                 | 54±0.64 <sup>b</sup>             |
| Q210S N161I             | -                      | -                 | n.d. <sup>a</sup>                |
| Q210S C209S             | -                      | -                 | n.d. <sup>a</sup>                |
| Q210S N213I             | -                      | -                 | 13±0.21 <sup>b</sup>             |
| Q210S N213I C209S       | -                      | -                 | n.d. <sup>a</sup>                |
| Q210S N213I N161I       | -                      | -                 | n.d. <sup>a</sup>                |
| Q210S N213I N161I C209S | -                      | -                 | n.d. <sup>a</sup>                |
|                         |                        |                   |                                  |
| AtzB_Hom_Pleo           | 0.15±2.7e-3            | 67±3.6            | 2.2e3±1.6e2                      |
| N165I                   | 0.026±4.7e-3           | 3.1e2±1.0e2       | 84±42                            |
| C213S                   | 8.5e-3±1.2e-3          | 5.3e2±1.1e2       | 16±5.6                           |
| Q214S                   | 0.017±2.7e-3           | 5.6e2±1.3e2       | 30±12                            |
| N217I                   | 0.036±0.010            | 4.3e2±1.8e2       | 85±59                            |
| N217I N165I             | 0.090±0.025            | 9.0e2±3.1e2       | 1.0e2±62                         |
| N217I C213S             | -                      | -                 | n.d. <sup>a</sup>                |
| N217I Q214S             | 0.032±3.3e-3           | 8.4e2±1.1e2       | 38±8.9                           |
| N217I N165I C213S       | -                      | -                 | n.d. <sup>a</sup>                |
| N217I N165I Q214S       | -                      | -                 | n.d. <sup>a</sup>                |
| N217I N165I Q214S C213S | -                      | -                 | n.d. <sup>a</sup>                |

Mean values and standard deviations are derived from triplicate measurements.<sup>a</sup> n.d.: no detectable activity in the presence of 10  $\mu M$  enzyme and 300  $\mu M$  substrate; <sup>b</sup> Values were determined from the linear dependence of the enzyme turnover rate on substrate concentration.



**Table S3.** Catalytic parameters of mutants of AtzB, AtzB\_Hom\_Hal, and AtzB\_Hom\_Pleo for the hydrolysis of hydroxyatrazine.

| Protein                        | $k_{cat}$ [ $s^{-1}$ ] | $K_M$ [ $\mu M$ ] | $k_{cat}/K_M$ [ $M^{-1}s^{-1}$ ] |
|--------------------------------|------------------------|-------------------|----------------------------------|
| AtzB                           | 5.3±0.66               | 21±7.8            | 2.4e5±1.2e5                      |
| I170N                          | 2.1±0.12               | 52±5.7            | 4.1e4±6.9e3                      |
| S218C                          | 2.1±0.13               | 41±5.3            | 5.2e4±1.0e4                      |
| S219Q                          | 1.7±0.13               | 44±6.9            | 3.8e4±9.1e3                      |
| I222N                          | 0.35±0.018             | 35±3.9            | 1.0e4±1.6e3                      |
| S218C I170N                    | 1.9±0.20               | 1.3e2±19          | 1.5e4±3.7e3                      |
| S218C S219Q                    | 0.60±0.081             | 34±11             | 1.8e4±8.1e3                      |
| S218C I222N                    | 0.43±0.035             | 60±8.7            | 7.1e3±1.6e3                      |
| S219Q I170N                    | 0.086±4.1e-3           | 65±5.4            | 1.3e3±1.7e2                      |
| I170N I222N                    | 0.062±2.2e-3           | 9.3±1.3           | 6.7e3±1.2e3                      |
| S219Q I222N                    | 0.030±1.7e-3           | 48±5.2            | 6.3e2±1.0e2                      |
| S218C S219Q I170N              | 0.13±0.012             | 27±6.4            | 4.8e3±1.6e3                      |
| S218C S219Q I222N              | 0.33±0.021             | 45±5.7            | 7.4e3±1.4e3                      |
| S218C I170N I222N              | 0.078±2.3e-3           | 18±1.5            | 4.4e3±5.2e2                      |
| S219Q I170N I222N <sup>a</sup> | -                      | -                 | 11 <sup>b</sup>                  |
| S218C S219Q I170N I222N        | 7.9e-3±2.6e-4          | 27±2.2            | 2.9e2±33                         |
| AtzB_Hom_Hal                   | -                      | -                 | n.d. <sup>c</sup>                |
| N161I                          | -                      | -                 | n.d. <sup>c</sup>                |
| C209S                          | -                      | -                 | n.d. <sup>c</sup>                |
| Q210S                          | 7.7e-3±4.0e-4          | 16±2.6            | 4.8e2±1.0e2                      |
| N213I                          | 0.025±3.4e-3           | 71±16             | 3.5e2±1.3e2                      |
| Q210S N161I                    | 0.010±8.3e-4           | 43±7.3            | 2.3e2±59                         |
| Q210S C209S                    | 4.4e-3±2.0e-4          | 9.9±1.4           | 4.4e2±81                         |
| Q210S N213I                    | 0.051±1.8e-3           | 42±3.0            | 1.2e3±1.3e2                      |
| Q210S N213I C209S              | 0.052±2.4e-3           | 23±2.8            | 2.2e3±3.6e2                      |
| Q210S N213I N161I              | 0.068±2.2e-3           | 20±1.8            | 3.4e3±4.1e2                      |
| Q210S N213I N161I C209S        | 0.44±0.026             | 19±3.1            | 2.3e4±5.1e3                      |
| AtzB_Hom_Pleo                  | 4.9e-3±6.7e-4          | 1.2e2±23          | 42±14                            |
| N165I                          | 0.029±7.9e-3           | 1.3e2±50          | 2.3e2±1.5e2                      |
| C213S                          | 1.0e-3±9.3e-5          | 15±4.3            | 69±27                            |
| Q214S                          | 0.020±1.1e-3           | 28±3.9            | 7.0e2±1.4e2                      |
| N217I                          | 0.075±5.0e-3           | 77±9.3            | 9.8e2±1.8e2                      |
| N217I N165I                    | 0.15±9.8e-3            | 23±3.9            | 6.7e3±1.6e3                      |
| N217I C213S                    | 0.11±0.022             | 1.1e2±34          | 9.5e2±4.9e2                      |
| N217I Q214S                    | 0.46±0.072             | 89±22             | 5.1e3±2.1e3                      |
| N217I N165I C213S              | 1.5±0.13               | 70±11             | 2.1e4±5.2e3                      |
| N217I N165I Q214S              | 1.1±0.050              | 19±2.3            | 5.9e4±9.8e3                      |
| N217I N165I Q214S C213S        | 7.5±0.29               | 28±2.6            | 2.7e5±3.5e4                      |

Mean values and standard deviations are derived from triplicate measurements.<sup>a</sup> Single measurement; <sup>b</sup> Values were determined from the linear dependence of the enzyme turnover rate on substrate concentration.; <sup>c</sup> n.d.: no detectable activity in the presence of 1  $\mu M$  enzyme and 75  $\mu M$  substrate.

**Table S4.** Synthesized genes used in this work.

|                     |                                                                                                                                                                                                                                                                                                                                                                                                                                                                                                                                                                                                                                                                                                                                                                                                                                                                                                                                                                                                                                                                                                                                                                                                                                                                                                                                                                                                                                                                                                                                                                                                                                                                                        |
|---------------------|----------------------------------------------------------------------------------------------------------------------------------------------------------------------------------------------------------------------------------------------------------------------------------------------------------------------------------------------------------------------------------------------------------------------------------------------------------------------------------------------------------------------------------------------------------------------------------------------------------------------------------------------------------------------------------------------------------------------------------------------------------------------------------------------------------------------------------------------------------------------------------------------------------------------------------------------------------------------------------------------------------------------------------------------------------------------------------------------------------------------------------------------------------------------------------------------------------------------------------------------------------------------------------------------------------------------------------------------------------------------------------------------------------------------------------------------------------------------------------------------------------------------------------------------------------------------------------------------------------------------------------------------------------------------------------------|
| <p>AtzB</p>         | <p>ATGACCACCACACTGTATACCGGTTTTTCATCAGCTGGTTACCGGTGATGT<br/> TGCAGGCACCGTTCTGAATGGTGTGATATTCTGGTTCGTGATGGTGAAA<br/> TTATTGGTCTGGGTCTGATCTGCCTCGTACACTGGCACCATTGGTGT<br/> GGTCAAGAACAGGGTGTGAAAGTTGTTAATTGTCGTGGTCTGACCGCATA<br/> TCCGGGTCTGATTAATACCCATCATCATTTTTTTTCAGGCCTTTGTGCGTA<br/> ATCTGGCACCCTGGATTGGACCCAGCTGGATGTTCTGGCATGGCTGCGT<br/> AAAATCTATCCGGTTTTTGCACCTGGTTGATGAGGATTGCATTTATCATAG<br/> CACCGTTGTTAGCATGGCCGAACCTGATTAAACATGGTTGTACCACCGCAT<br/> TTGATCACCAGTATAACTATAGCCGTCGTGGTGGTCCGTTTTCTGGTTGAT<br/> CGTCAGTTTGATGCAGCAAATCTGCTGGGTCTGCGTTTTTCATGCAGGTCG<br/> TGGTTGTATTACCCTGCCGATGGCAGAAGGTAGCACCATTCCGGATGCAA<br/> TGCGTGAAAAGCACCGATACTTTCTGGCAGATTGTGAACGTCTGGTTAGC<br/> CGTTTTTCATGATCCGCGTCCGTTTTGCAATGCAGCGTGTGTTGTTGCACC<br/> GAGCAGTCCGGTTATTGCCTATCCGGAAACCTTTGTTGAAAGCGCACGTC<br/> TGGCACGTCATCTGGGTGTTAGCCTGCATACCCATTTAGGTGAAGGTGAA<br/> ACACCGGCAATGGTTGCACGTTTTTGGTGAACGTAGCCTGGATTGGTGTGA<br/> AAATCGTGGTTTTTGTGGTCCGGATGTTTGGCTGGCACATGGTTGGGAAT<br/> TTACCGCAGCAGATATTGCCCGTCTGGCAGCAACCGGCACCGGTGTTGCA<br/> CATTGTCCGGCACCTGTTTTTCTGGTGGGTGCAGAAGTTACCGATATTCC<br/> TGCAATGGCAGCAGCCGGTGTTCGTGTTGGTTTTTGGCGTTGATGGTCATG<br/> CAAGCAATGATAGCAGCAATCTGGCAGAATGTATTCTGCTGGCATACTG<br/> CTGCAGTGTCTGAAAGCAAGCGAACGTCAGCATCCGGTCCGGCACCGTA<br/> TGATTTTTCTGCGTATGGCAACCAAGGTGGTGCAGATTGTCTGAATCGTC<br/> CGGATCTGGGTGCACTGGCAGTTGGTCTGCAGCCGATTTTTTTTGCAGTG<br/> GATCTGAATCGCATTGAATATATTGGTGCAAATCATGATCCTCGTAGCCT<br/> GCCTGCAAAAAGTTGGTTTTAGCGGTCCGGTTGATATGACCGTTATTAATG<br/> GTAAAGTTGTGTGGCGCAATGGTGAATTTCCCTGGTCTGGATGAAATGGAA<br/> CTGGCACGTGCAGCAGATGGTGTTTTTCTGTCGTGTTATTTATGGTGATCC<br/> GCTGGTTGCAGCACTGCGTCTGGTACAGGTGTTACCCCGTGT</p> |
| <p>AtzB_Hom_Hal</p> | <p>ATGAGCACCGTTCTGTTTCGTAATTTTCGTCAGCTGGTTTGTGCGGGTGC<br/> ACCGGGTAGCGTTCTGCGTGATGTTGATCTGTGTGCACGTGATGGTATGA<br/> TTACCGCAATTGGTCCGCAGCTGCCGCTGACCGATGTTGATGAAGTTGTT<br/> GATTGTGGTGGTCTGACCGCATATCCTGGTCTGGTTAATACCCATCATCA<br/> TTTTTTTCAGGCCCTGGTTCGTAATCTGCCAGGTCTGGATTGGACCACAC<br/> TGAGCCTGCTGGAATGGCTGGATAACCATTTATCCGATTTTTTGCACGTCTG<br/> GATGAGGATTGTATTTATCATGCAAGCCTGATTAGCCTGGCCGATCTGCT<br/> GAAACATGGTTGTACCACCGCATTTGATCACCAGTATAACTTTAATAGCA<br/> ATATGGGTAGCCGTGTTGTGGATCGTCAGTTTGAAGCAGCAGCACTGCTG<br/> GGTGCCCGTCTGCATGTTGGTCTGGTGTGTAATACCCCTGCCGATGAGCGC<br/> AGGTAGCACCATTCCGGATGCAATGCTGGAAACCACCGATGCATTTCTGG<br/> CCGATTGTGAACGTCTGATTGGTGCATTTCATAATCCGGCACCGGGTGCA<br/> ATGGCACAGTTGTTGTTGCACCGTGTGACCCGGTTAATAGCCTGCCGGA<br/> AACCTTTCCGGAAGCCGCAGCGCTGGCACGTGCTCATGGTGTTCGTCTGC<br/> ATACCCATCTGAGCGAAGGTGAAAATGCAGCCATGCTGGATCGTTTTGGT<br/> ATGCGTAGCCTGGATTGGTGTGAAAGCGTTGGTTTTTGTGGTCCGGATGT<br/> TTGGTTTTGCACATGGTTGGGAATTTACCCCTCCGGAAATTGCGCGTCTGG<br/> CAGCAACCGGTACAGGTGTTGCACATTGTCCGGCTCCGGTTTTTTCTGGTT<br/> GGTGCAGAAGTTACCGATCTGCCTGCAATGGTTGCAGCAGATATGACCGT<br/> TGGTATGGGTGTTGATGGTCTAGGCAAGCAATGATAGCAGCAATCTGGCAG<br/> AATGTATGCGTCTGGCCTACCTGCTGCAGTGTCTGAATGCACGCCATAAT<br/> CCGCTGCCTGCACCGCCTCCGGAACGTTATCTGCATATGGCAACCGCAGG<br/> CGGTGCCGATGTCTGGGTCTGACCGATATTGGTGAACGGCAGTTGGTA<br/> AAGCAGCAGATTTTTTTCTGTGCAGATCTGAATGGCCTGGATTATGCCGGT<br/> GCAGATAGCGATCCGCTGAGTCTGCCTGCCAAAGTGGTTTTTGCAGGTCC</p>                                                                                                                                                                                                                          |

|               |                                                                                                                                                                                                                                                                                                                                                                                                                                                                                                                                                                                                                                                                                                                                                                                                                                                                                                                                                                                                                                                                                                                                                                                                                                                                                                                                                                                                                                                                                                                                       |
|---------------|---------------------------------------------------------------------------------------------------------------------------------------------------------------------------------------------------------------------------------------------------------------------------------------------------------------------------------------------------------------------------------------------------------------------------------------------------------------------------------------------------------------------------------------------------------------------------------------------------------------------------------------------------------------------------------------------------------------------------------------------------------------------------------------------------------------------------------------------------------------------------------------------------------------------------------------------------------------------------------------------------------------------------------------------------------------------------------------------------------------------------------------------------------------------------------------------------------------------------------------------------------------------------------------------------------------------------------------------------------------------------------------------------------------------------------------------------------------------------------------------------------------------------------------|
|               | GGCAGCAATGACCGTGGTTCATGGTCGTGTTGTTTGGCGTGATGGTGAAT<br>TTCCGGGTTTAGATGAAAACCCAGCTGCGTAGCGCAGCAGATGCCCTGCTG<br>CGTGAAAAACTGGATGGTCATCTGGCACCGCTGCGTACACCGGGT                                                                                                                                                                                                                                                                                                                                                                                                                                                                                                                                                                                                                                                                                                                                                                                                                                                                                                                                                                                                                                                                                                                                                                                                                                                                                                                                                                            |
| AtzB_Hom_Pleo | ATGGGCAACTATCTGCTGAAAAATTGTGCAGCAGTTATGGTTGATGATGG<br>TGCAGGTCTGAATGCACGTCGTAATGTTGATATTCTGACCGATGGTCCGG<br>CAATTAAGCAATTGAACCGCATCTGGCAGAAACACCGCAGAGCGTTGGT<br>GCCGAAGTTATTGATGCAAGCGGTTGGTTTGTATCCTGGTCTGGTTAA<br>TACCCACCACCATTTTTTTCAGACCTTTGTTTCGTAATCGTGCAGAACTGG<br>ATTGGACCAAACCTGAGCGTTCGGAATGGCTGGATCGTATTTATCCGATT<br>TTTAGCCAGCTGACCGAAGATTGCTTTTATCATAGCAGCCTGACCGCAAT<br>GGCAGAACTGATTAAACATGGTTGTACCACCGCACTGGATCATCAGTATT<br>GTTTTCCGCGTCATGCAGGTAAATATCTGGTTGATCGTCAGTTTGAAGCA<br>GCAGAACGTCTGGGTATTCGTTATCATGCCGGTCGTGGTGGTAATACCCT<br>GCCGAAAAGCGAAGGTAGCACCATTCGGATGCAATGCTGGAAACACCG<br>ATGAATTTCTGGCAGATTGTGAACGTCTGATTGATCGTATCATGATGCA<br>AGTCCGTTTAGCCTGCGTCAGGTTGTTATTAGCCCGTGTGAGCCGGTTAA<br>TAGCTATCGTGAAACCTTTGTTGAAAGCGTTGCACTGGCACGTGATAAAG<br>GTGTTTTTCTGCATACCCATGTTGGTGAAGGTGAAAGTCCGGTTATGGAA<br>GCACGTGATGGTAAACGTACCGTTGATTATCTGGAAGAAATGGGTTTTGC<br>AGGTCCGGATGTTTTTTATGCACATTGTTGGGAACTGACCCATACCGAAC<br>TGGCAAAACTGGCAGCAAGCGGCACCGGTGTTAGCCATTGTCCGGAACCG<br>GTTTATCTGGTGGGTGCAGAAGTTACCGATATTCCAGCCATGGCAGCACT<br>GGGTGTTGTTGGTCTGGGTTGTGATGGTAGCGCAAGCAATGATAATA<br>GTAATCTGATGCATTGCATTCATAGCGCCTATATGCTGCAGTGTCTGGTT<br>GCAAGCAGCCGTAGCCATCCTGTTCCGGCACCGGCAGAATTTCTGCGTTT<br>TGCAACCACCGGTAGCGCCAGCCTGCTGGGTGCGTGCAGATATTGGTCGTC<br>TGGCACCTGGTATGGCAGCAGACCTGTTTGCAATTGATACCCGTCGTATG<br>GATTATGTTGGCACCCGTCATGATCCGCTGAGCCTGCCTGCAAAATTAGG<br>TATTGGTATGGCCACCGATCTGACCATGATTAATGGTCGTATTGTTGGG<br>CCAATGGTGAATTTCCGGGTATTGATGAAGCAGAAATGGCAGCCGAAGCA<br>GAAGCAACCCTGGCAACCATTGATTTT |

**Table S5.** Nucleotide primers used in this work.

| Name                           | Sequence                                   | Use                                                                                                                                   |
|--------------------------------|--------------------------------------------|---------------------------------------------------------------------------------------------------------------------------------------|
| CyRI                           | TCACGAGGCCCTTTCGTCTT                       | Forward sequencing primer (pUR22)                                                                                                     |
| CyPstI                         | TCGCCAAGCTAGCTTGGATTCT                     | Reverse sequencing primer (pUR22)                                                                                                     |
| EcAtzB_pET21a_fw               | AAAAAAGGTCTCACATGACCACCACACTGTATACCG<br>G  | Cloning of codon optimized <i>atzB</i> gene                                                                                           |
| EcAtzB_pET21a_rv               | TTTTTTGGTCTCTCGAGACACGGGGTAACACCTGTAC<br>C | Cloning of codon optimized <i>atzB</i> gene                                                                                           |
| EcGuaD_fw_pET21a_BsaI          | AAAAAAGGTCTCACATGATGTCAGGAGAACAC           | Cloning of wild-type <i>guaD</i> gene ( <i>E. coli</i> )                                                                              |
| EcGuaD_rv_pET21a_BsaI          | TTTTTTGGTCTCTCGAGGTGCGTTTCGTACAC           | Cloning of wild-type <i>guaD</i> gene ( <i>E. coli</i> )                                                                              |
| EcAtzB-Hom-Hal_fw_pET21a_BsaI  | AAAAAAGGTCTCACATGAGCACCGTTCTGTTCG          | Cloning of codon optimized <i>atzB_Hom_Hal</i> gene                                                                                   |
| EcAtzB-Hom-Hal_rv_pET21a_BsaI  | TTTTTTGGTCTCTCGAGGCCCGGTGTACGCAGC          | Cloning of codon optimized <i>atzB_Hom_Hal</i> gene                                                                                   |
| EcAtzB-Hom-Pleo_fw_pET21a_BsaI | AAAAAAGGTCTCACATGGGCAACTATCTGCTG           | Cloning of codon optimized <i>atzB_Hom_Pleo</i> gene                                                                                  |
| EcAtzB-Hom-Pleo_rv_pET21a_BsaI | TTTTTTGGTCTCTCGAGAAAATCAATGGTTGCCAGGG      | Cloning of codon optimized <i>atzB_Hom_Pleo</i> gene                                                                                  |
| AtzB_N139C_fw                  | TGCTATAGCCGTCGTGGTGG                       | Mutagenesis (with AtzB_N139C_rv)                                                                                                      |
| AtzB_N139C_rv                  | ATACTGGTGATCAAATGCGGTGG                    | Mutagenesis                                                                                                                           |
| AtzB_I170N_fw                  | AACACCCTGCCGATGGCAG                        | Mutagenesis (with AtzB_I170N_rv)                                                                                                      |
| AtzB_I170N_rv                  | ACAACCACGACCTGCATGAAAACG                   | Mutagenesis                                                                                                                           |
| AtzB_S218C_fw                  | TGCAGTCCGGTATTGCCTATCCGG                   | Mutagenesis (with AtzB_S218_S219_rv)                                                                                                  |
| AtzB_S219Q_fw                  | AGCCAGCCGGTATTGCCTATCCGG                   | Mutagenesis (with AtzB_S218_S219_rv)                                                                                                  |
| AtzB_S218C_S219Q_fw            | TGCCAGCCGGTATTGCCTATCCGG                   | Mutagenesis (with AtzB_S218_S219_rv)                                                                                                  |
| AtzB_S218-S219_rv              | CGGTGCAACAACAACACGCTGCATTGCAAACGGAC        | Mutagenesis                                                                                                                           |
| AtzB_I222N_fw                  | AACGCCTATCCGGAAACCTTTGTTGAAAGC             | Mutagenesis (with AtzB_I222_A223_rv; AtzB_C_I222_A223_rv; AtzB_CQ_I222_A223_rv)                                                       |
| AtzB_A223S_fw                  | ATTAGCTATCCGGAAACCTTTGTTGAAAGCGC           |                                                                                                                                       |
| AtzB_I222N_A223S_fw            | AACAGCTATCCGGAAACCTTTGTTGAAAGC             |                                                                                                                                       |
| AtzB_I222_A223_rv              | AACCGGACTGCTCGGTGCAAC                      | Mutagenesis                                                                                                                           |
| AtzB_C_I222_A223_rv            | AACCGGACTGCACGGTGCAAC                      | Mutagenesis (maintains S218C background)                                                                                              |
| AtzB_CQ_I222_A223_rv           | AACCGGCTGGCACGGTGCAAC                      | Mutagenesis (maintains S218C_S219Q background)                                                                                        |
| AtzB_C169G_fw                  | GGCATTACCCTGCCGATGGC                       | Mutagenesis (with AtzB_C169G_rv)                                                                                                      |
| AtzB_C169G_I170N_fw            | GGCAACACCCTGCCGATGGC                       | Mutagenesis (with AtzB_C169G_rv)                                                                                                      |
| AtzB_C169G_rv                  | ACCACGACCTGCATGAAAACGC                     | Mutagenesis                                                                                                                           |
| AtzB_Hom_Hal_N161I_rv          | AGGGTAATACAACCACGACCAACATGCAGACGGG         | Mutagenesis (with AtzB_Hom_Hal_N161_rv)                                                                                               |
| AtzB_Hom_Hal_N161_rv           | AGGGTATTACAACCACGACCAACATGCAGACGGG         | Mutagenesis                                                                                                                           |
| AtzB_Hom_Hal_N213I_fw          | GTTATTAGCCTGCCGGAAACCTTTCCGGAAGCC          | Mutagenesis (with AtzB_Hom_Hal_C209S_Q210Q_rv; AtzB_Hom_Hal_C209C_Q210S_rv; AtzB_Hom_Hal_C209S_Q210S_rv; AtzB_Hom_Hal_C209C_Q210Q_rv) |
| AtzB_Hom_Hal_N213N_fw          | GTTAATAGCCTGCCGGAAACCTTTCCGGAAGCC          |                                                                                                                                       |
| AtzB_Hom_Hal_C209S_Q210Q_rv    | CGGCTGGCTCGGTGCAACAACAACCTGTGCC            | Mutagenesis                                                                                                                           |
| AtzB_Hom_Hal_C209C_Q210S_rv    | CGGGCTACCGGTGCAACAACAACCTGTGCC             | Mutagenesis                                                                                                                           |

|                                     |                                    |                                                                                                                                                       |
|-------------------------------------|------------------------------------|-------------------------------------------------------------------------------------------------------------------------------------------------------|
| AtzB_Hom_Hal<br>_C209S_Q210S_rv     | CGGGCTGCTCGGTGCAACAACAACCTGTGCC    | Mutagenesis                                                                                                                                           |
| AtzB_Hom_Hal<br>_C209C_Q210Q_rv     | CGGCTGACACGGTGCAACAACAACCTGTGCC    | Mutagenesis                                                                                                                                           |
| AtzB_Hom_Pleo_N165_fw               | CCGAAAAGCGAAGGTAGCACCATTCCGG       | Mutagenesis (with<br>AtzB_Hom_Pleo_N165I_rv)                                                                                                          |
| AtzB_Hom_Pleo_N165I_rv              | CAGGGTAATACCACCACGACCGGCATGATAACG  | Mutagenesis                                                                                                                                           |
| AtzB_Hom_Pleo_N217I<br>_fw          | GTTATTAGCTATCGTGAAACCTTTGTTGAAAGCG | Mutagenesis (with<br>AtzB_Hom_Pleo_C213S_Q214Q_rv;<br>AtzB_Hom_Pleo_C213C_Q214S_rv;<br>AtzB_Hom_Pleo_C213S_Q214S_rv;<br>AtzB_Hom_Pleo_C213C_Q214Q_rv) |
| AtzB_Hom_Pleo_N217N<br>_fw          | GTTAATAGCTATCGTGAAACCTTTGTTGAAAGCG |                                                                                                                                                       |
| AtzB_Hom_Pleo<br>_C213S_Q214Q_rv    | CGGCTGGCTCGGGCTAATAACAACC          | Mutagenesis                                                                                                                                           |
| AtzB_Hom_Pleo<br>_C213C_Q214S_rv    | CGGGCTACACGGGCTAATAACAACC          | Mutagenesis                                                                                                                                           |
| AtzB_Hom_Pleo<br>_C213S_Q214S_rv    | CGGGCTGCTCGGGCTAATAACAACC          | Mutagenesis                                                                                                                                           |
| AtzB_Hom_Pleo<br>_C213C_Q214Q_rv    | CGGCTGACACGGGCTAATAACAACC          | Mutagenesis                                                                                                                                           |
| AtzB_Hom_Pleo_N217I<br>_in_Q214S_rv | CGGGCTACACGGGCTAATAAC              | Mutagenesis (with AtzB_Hom_Pleo_<br>N217I_fw)                                                                                                         |
